# Supplementary material for: Tuning the Magnetic Properties of Two-Dimensional MXenes by Chemical Etching
Source: PubMed Central journal article supplement (PMC7867348; doi:10.3390/ma14030694), 2021-02-02
Supplement: materials-14-00694-s001.pdf [file materials-14-00694-s001.pdf]

Supplementary

# Tuning the Magnetic Properties of Two-Dimensional MXenes by Chemical Etching

Kemryn Allen-Perry<sup>1</sup>, Weston Straka<sup>2</sup>, Danielle Keith<sup>1</sup>, Shubo Han<sup>1</sup>, Lewis Reynolds<sup>2</sup>, Bhoj Gautam<sup>1</sup> and Daniel E. Autrey<sup>1,\*</sup>

- <sup>1</sup> Department of Chemistry, Physics and Materials Science, Fayetteville State University, Fayetteville, NC 28301, USA; kallenpe@broncos.uncfsu.edu (K.A.-P.); dkeith2@broncos.uncfsu.edu (D.K.); shan@uncfsu.edu (S.H.); bgautam@uncfsu.edu (B.G.)
- <sup>2</sup> Department of Materials Science and Engineering, North Carolina State University, Raleigh, NC 27695, USA; wjstraka@ncsu.edu (W.S.); clreynol@ncsu.edu (L.R.)
- \* Correspondence: dautrey@uncfsu.edu

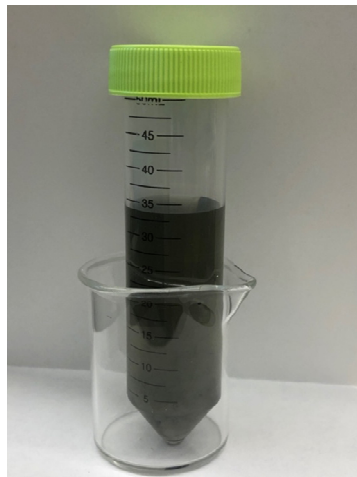

(a)

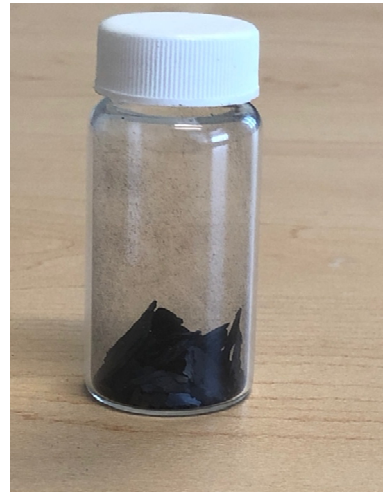

(b)

**Figure S1.** Ti<sub>3</sub>C<sub>2</sub>T<sub>x</sub> MXene synthesis. (a) Decantate from washing (b) Dried Ti<sub>3</sub>C<sub>2</sub>T<sub>x</sub> product.
